# Supplementary material for: Difference in Cd accumulation among varieties with different growth duration corresponding to typical agro-climate condition in rice ratooning system
Source: Frontiers journal article supplement (doi:10.3389/fpls.2024.1383428), 2024-05-08
Supplement: Image_1.pdf [file Image_1.pdf]

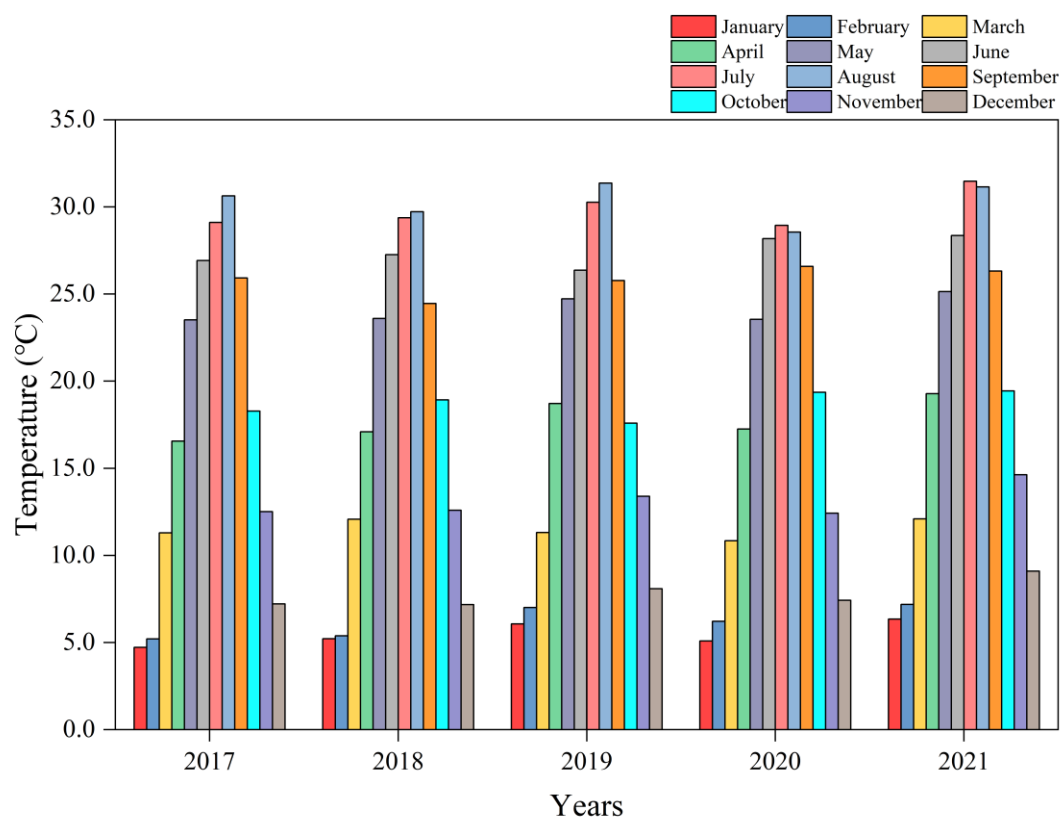

**Fig. S1.** Average temperatures in each month from 2017 to 2021.

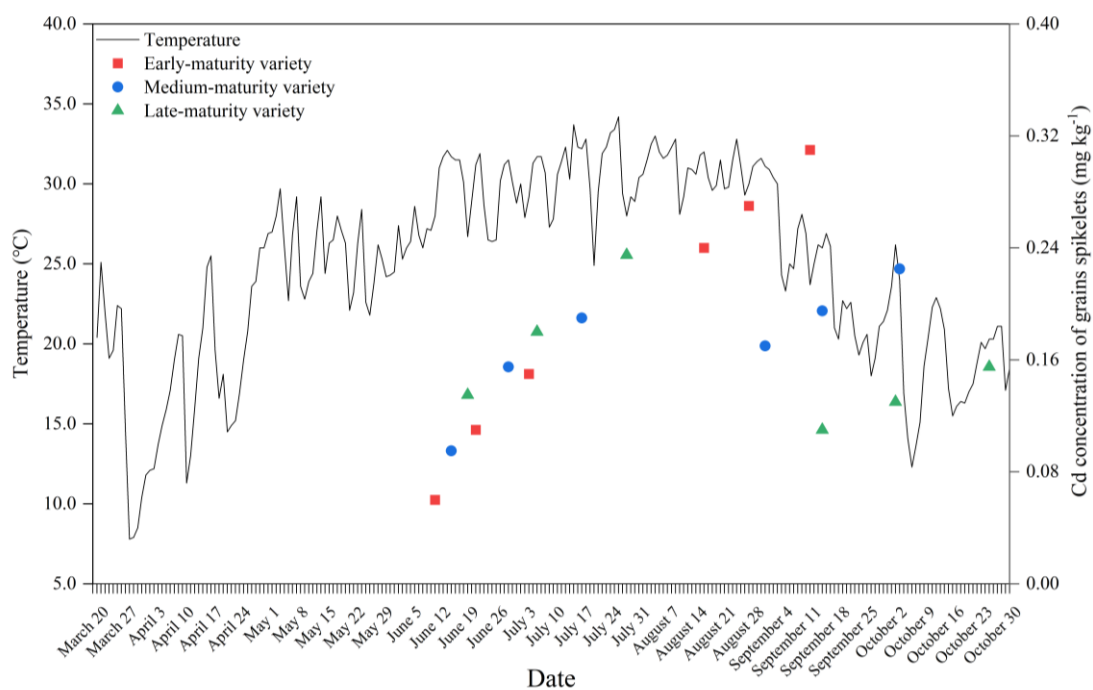

**Fig. S2.** Trends in Cd concentration and temperature in grain spikelets of ratoon rice varieties at different growth duration. For each variety, the growth stages are full-heading, milky, maturity in main crop, and full-heading, milky, maturity in ratoon crop as time goes by.
